# Supplementary material
Source: MDPI journal article supplement (https://www.mdpi.com/2308-3417/9/1/21)
Supplement: s1 [file s1]

**Supplementary Table S1.** Changes in each variable before and after Choisoko system use.

| Valuable                   | Men Group<br>(N = 16) |                       | Women Group<br>(N = 47) |                     | <i>p</i> -value |
|----------------------------|-----------------------|-----------------------|-------------------------|---------------------|-----------------|
|                            | N                     | Mean $\pm$ SD         | N                       | Mean $\pm$ SD       |                 |
| Height                     | 10                    | -2.6 $\pm$ 5.9        | 39                      | 0.4 $\pm$ 2.2       | 0.151           |
| Weight                     | 10                    | -1.4 $\pm$ 7.3        | 37                      | 0.2 $\pm$ 1.4       | 0.508           |
| BMI                        | 10                    | 0.2 $\pm$ 3.2         | 37                      | 0.0 $\pm$ 1.0       | 0.820           |
| Body fat percentage        | 10                    | 2.2 $\pm$ 8.9         | 35                      | 0.2 $\pm$ 2.5       | 0.502           |
| Alb                        | 10                    | -0.1 $\pm$ 0.2        | 40                      | -0.1 $\pm$ 0.2      | 0.944           |
| AST                        | 10                    | 5.1 $\pm$ 14.2        | 40                      | -0.6 $\pm$ 7.0      | 0.245           |
| ALT                        | 10                    | -1.1 $\pm$ 6.5        | 40                      | -1.0 $\pm$ 5.8      | 0.957           |
| BUN                        | 10                    | 1.8 $\pm$ 4.8         | 40                      | 1.3 $\pm$ 4.2       | 0.776           |
| CRE                        | 10                    | -0.1 $\pm$ 0.2        | 40                      | 0.0 $\pm$ 0.1       | 0.404           |
| eGFR                       | 10                    | 1.7 $\pm$ 5.9         | 39                      | 1.7 $\pm$ 6.3       | 0.994           |
| WBC                        | 10                    | -290.0 $\pm$ 528.0    | 40                      | 202.5 $\pm$ 1468.7  | 0.093           |
| RBC                        | 10                    | -7.4 $\pm$ 22.0       | 40                      | -15.4 $\pm$ 18.1    | 0.312           |
| Hb                         | 10                    | 0.1 $\pm$ 0.6         | 40                      | -0.2 $\pm$ 0.6      | 0.188           |
| Ht                         | 10                    | -0.3 $\pm$ 2.1        | 40                      | -0.8 $\pm$ 1.7      | 0.481           |
| MCV                        | 10                    | 0.8 $\pm$ 1.5         | 40                      | 1.6 $\pm$ 1.7       | 0.184           |
| MCH                        | 10                    | 0.8 $\pm$ 0.7         | 40                      | 0.8 $\pm$ 0.9       | 0.804           |
| MCHC                       | 10                    | 0.5 $\pm$ 0.8         | 40                      | 0.3 $\pm$ 0.9       | 0.453           |
| Platelet                   | 10                    | -0.2 $\pm$ 2.4        | 40                      | -0.2 $\pm$ 2.7      | 0.953           |
| Grip strength (right)      | 10                    | -0.7 $\pm$ 2.0        | 38                      | -1.3 $\pm$ 3.0      | 0.446           |
| Grip strength (left)       | 10                    | -2.0 $\pm$ 3.6        | 38                      | -1.4 $\pm$ 2.2      | 0.678           |
| Stand up                   | 9                     | -0.9 $\pm$ 3.1        | 37                      | 1.3 $\pm$ 12.9      | 0.357           |
| Walk speed                 | 10                    | 0.1 $\pm$ 0.5         | 38                      | 0.1 $\pm$ 1.8       | 0.950           |
| Walk speed max             | 10                    | -3.1 $\pm$ 11.0       | 38                      | -0.3 $\pm$ 2.3      | 0.448           |
| Muscle                     | 10                    | -1.4 $\pm$ 2.6        | 35                      | 0.1 $\pm$ 0.9       | 0.111           |
| Volume of iliopsoas muscle | 10                    | -3630.0 $\pm$ 14140.2 | 40                      | -470.0 $\pm$ 6605.3 | 0.507           |
| FIM total score            | 10                    | 0.6 $\pm$ 1.3         | 40                      | 0.0 $\pm$ 0.8       | 0.204           |
| FIM exercise score         | 10                    | 0.4 $\pm$ 0.8         | 40                      | 0.0 $\pm$ 0.5       | 0.155           |
| FIM cognitive score        | 10                    | 0.2 $\pm$ 0.6         | 40                      | 0.0 $\pm$ 0.4       | 0.424           |
